# Supplementary material for: One action, two benefits: improving the performance of lithium–sulfur batteries with a poly(ionic liquid)
Source: Royal Society of Chemistry journal article supplement (doi:10.1039/d4ma00115j), 2024-01-01
Supplement: d4ma00115j1.pdf [file d4ma00115j1.pdf]

## Supporting Information

### **One action, two benefits: Improving the performance of lithium-sulfur battery with a poly(ionic liquid)**

*Sixin Jia<sup>‡a</sup>, Rui Wang<sup>‡a</sup>, Fengquan Liu<sup>\*b</sup>, Hong Huo<sup>a</sup>, Jianjun Zhou<sup>\*a</sup>, Lin Li<sup>\*ab</sup>*

<sup>a</sup> Beijing Key Laboratory of Energy Conversion and Storage Materials, College of Chemistry, Beijing Normal University, Beijing 100875, China

<sup>b</sup> College of Textiles & Clothing, Qingdao University, Qingdao 266071, China

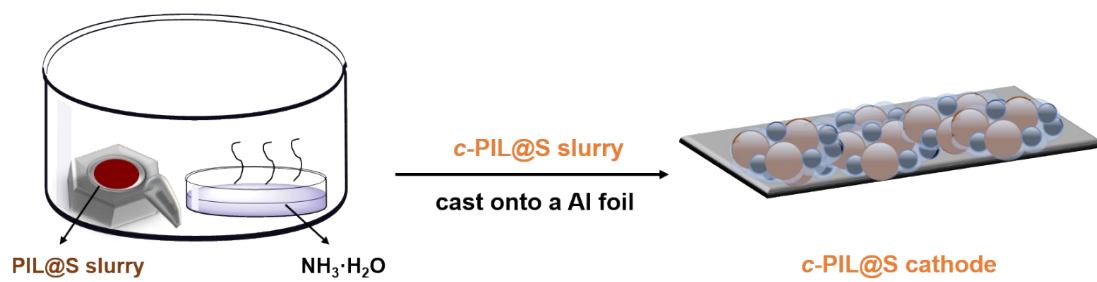

**Fig. S1.** Schematic diagram of preparing *c*-PIL@S composite cathode.

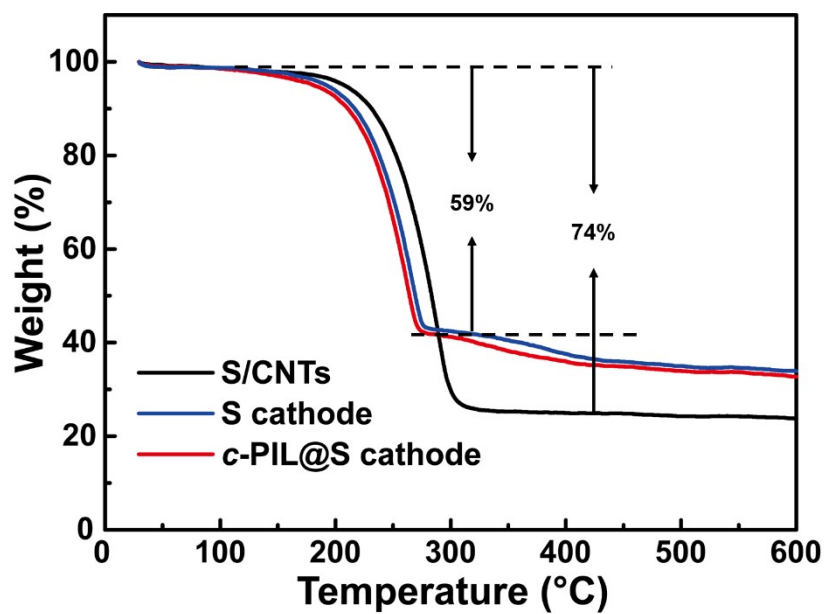

**Fig. S2.** TGA profiles of S/CNTs, blank S cathode and *c*-PIL@S cathode.

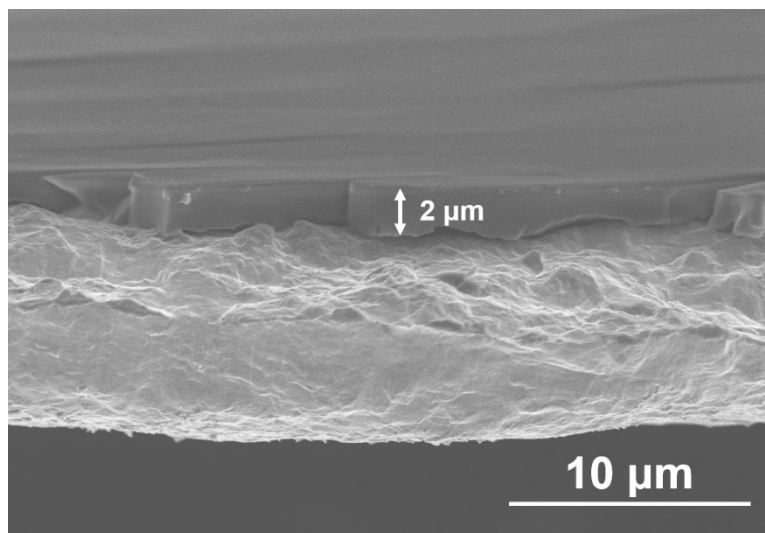

**Fig. S3.** Cross-sectional morphology of PIL@Cu.

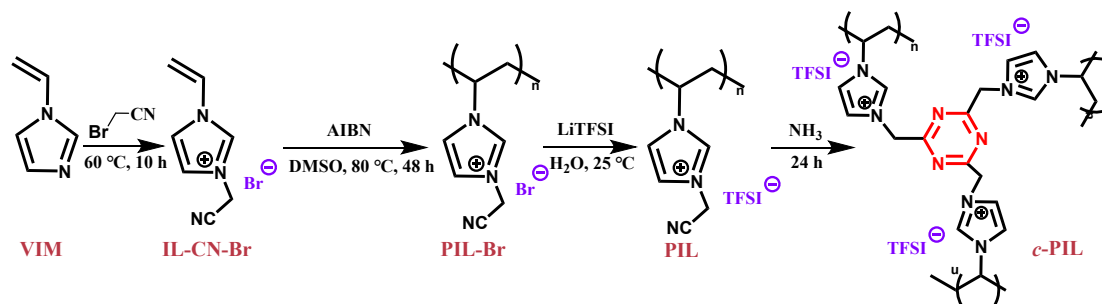

**Fig. S4.** The synthetic route of the PIL and *c*-PIL.

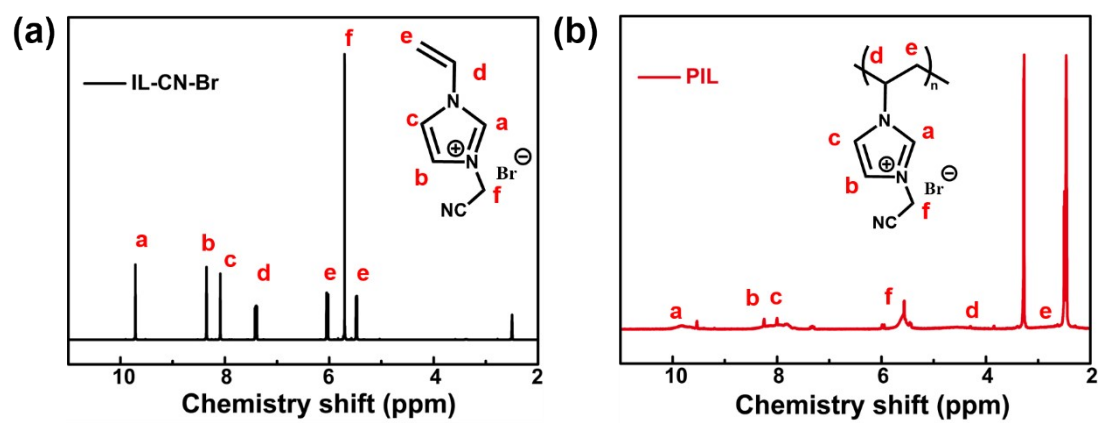

**Fig. S5.**  $^1\text{H}$  NMR spectra of (a) IL-CN-Br and (b) PIL.

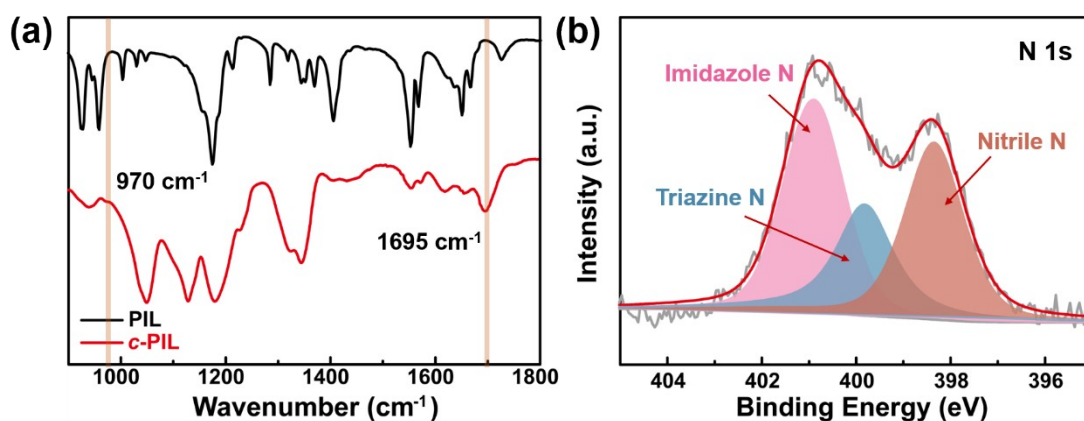

**Fig. S6.** (a) FTIR spectra of PIL (black line) and *c*-PIL (red line); (b) The XPS spectrum of N 1s for *c*-PIL.

In order to verify the structure variation of nitrile groups, FTIR spectra were used to characterize the PIL before and after NH<sub>3</sub> vapor treatment. For the triazine group, there exist two characteristic bands: one at 970 cm<sup>-1</sup> (attributed to C-N bond), another at 1695 cm<sup>-1</sup> (attributed to C=N bond). As shown in Fig. S6a, the two characteristic bands don't appear in PIL, but they are observed in *c*-PIL, indicating that PIL has been cross-linked with triazine. In addition, in the N 1s spectrum of X-ray photoelectron spectroscopy (XPS), besides the peaks at 400.9 eV (N on imidazole) and 398.4 eV (N on -CN group), a peak at 399.8 eV (N on triazine) can be split (Fig. S6b), which further verify the cross-linking of PIL with triazine.

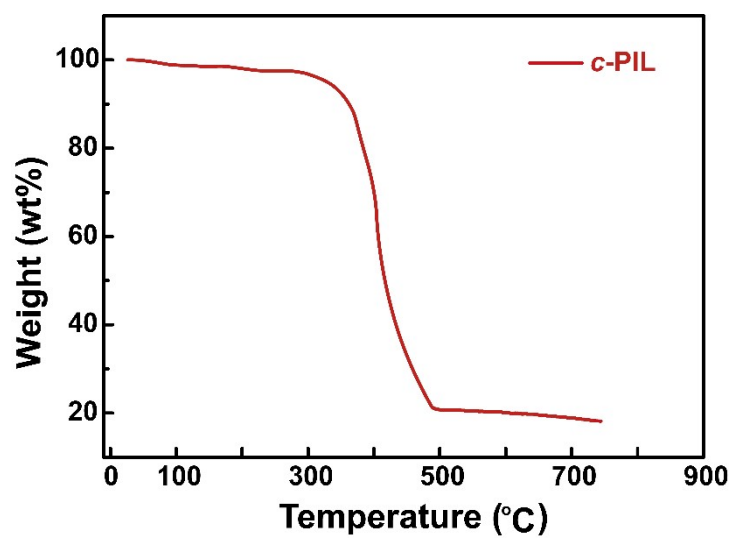

**Fig. S7.** The TGA curve of the *c*-PIL.



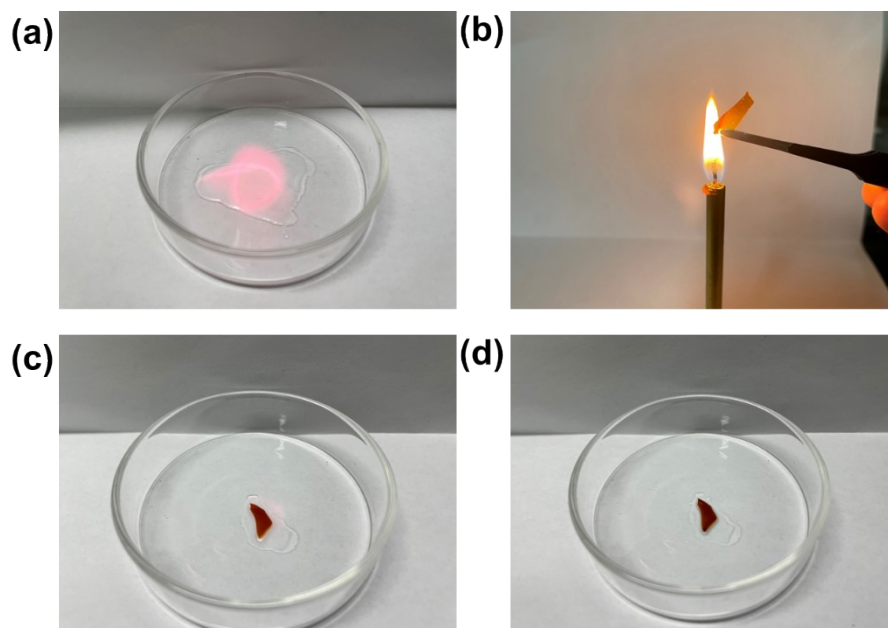

**Fig. S8.** Photographs demonstrating flammable behavior of (a) liquid electrolyte and (b-d) *c*-PIL.

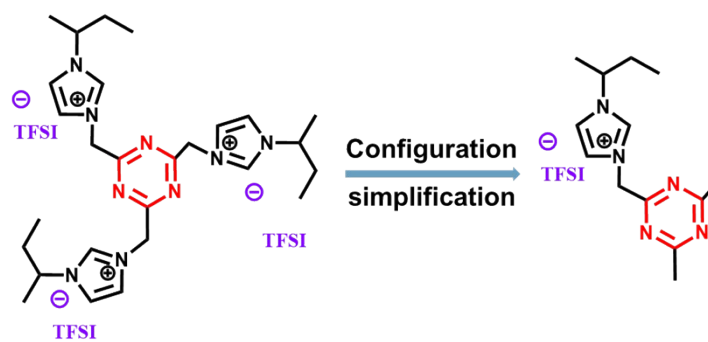

**Fig. S9.** Simplified configuration of *c*-PIL for calculation.

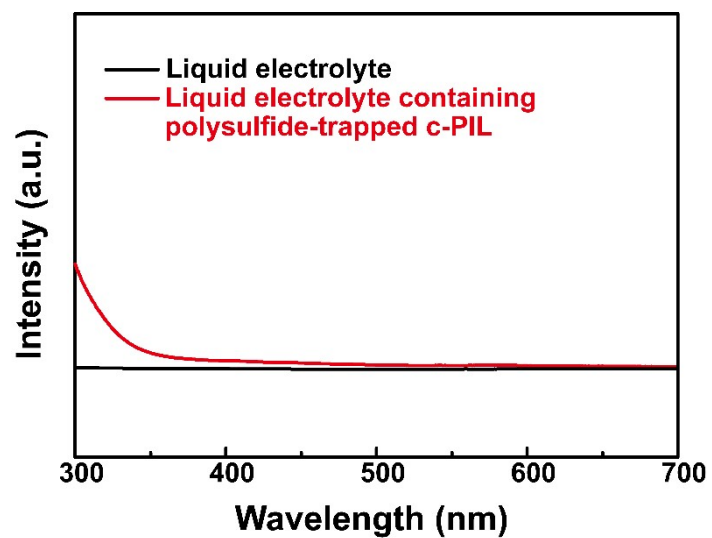

**Fig. S10.** The releasing of polysulfide in liquid electrolyte containing polysulfide-absorbed *c*-PIL.

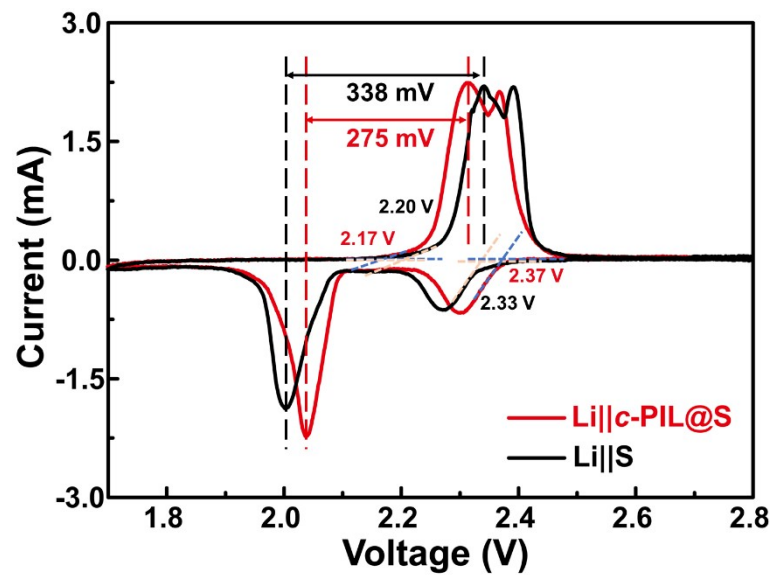

**Fig. S11.** CV curves of Li||S and Li||c-PIL@S batteries at  $0.1 \text{ mV S}^{-1}$ .

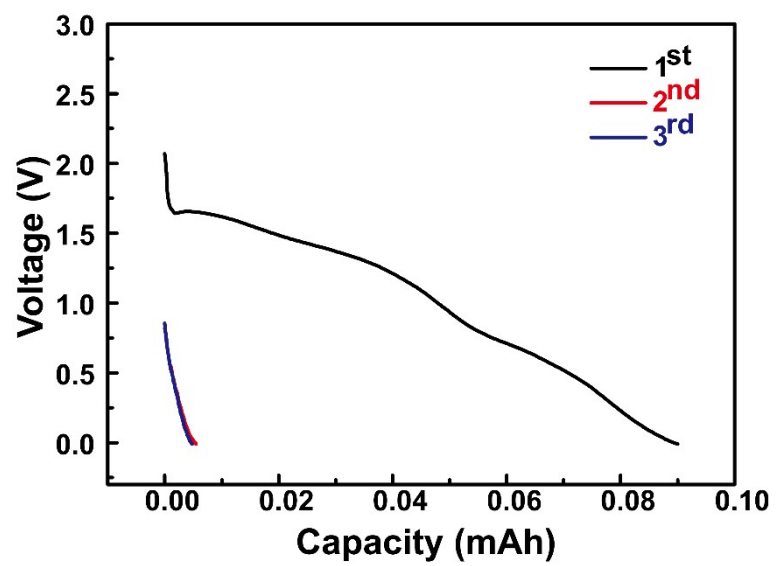

**Fig. S12.** The discharge curves of Li||PIL@Cu battery in the first 3 cycles at 0.01 mA cm<sup>-2</sup>.

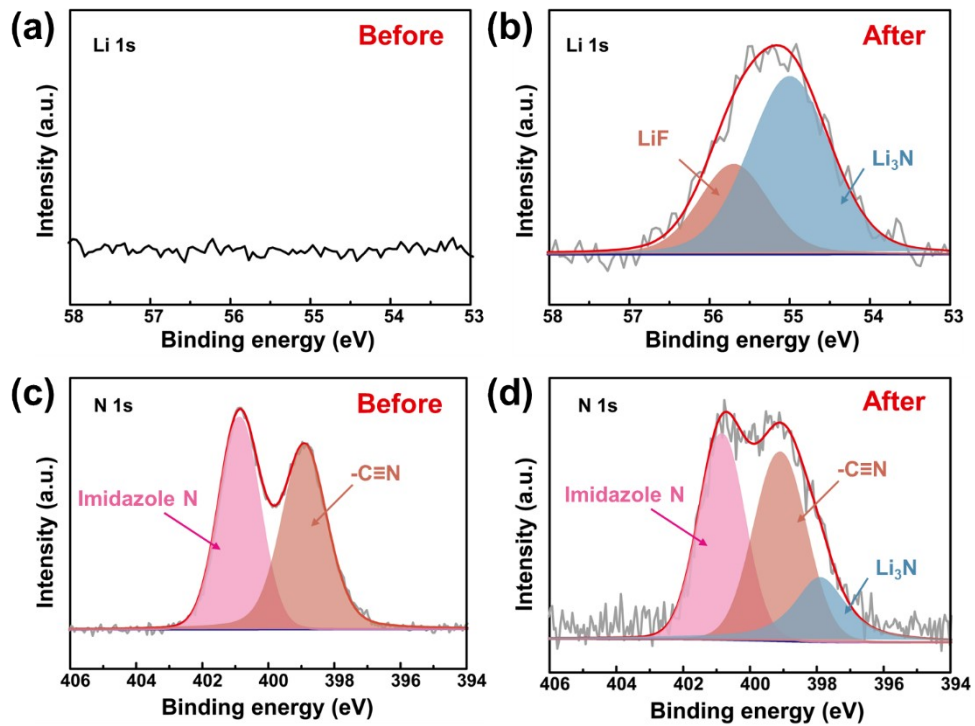

**Fig. S13.** XPS spectra of PIL removed PIL@Cu foil surface. Li 1s spectra (a) before and (b) after Li deposition; N 1s spectra (c) before and (d) after Li deposition.

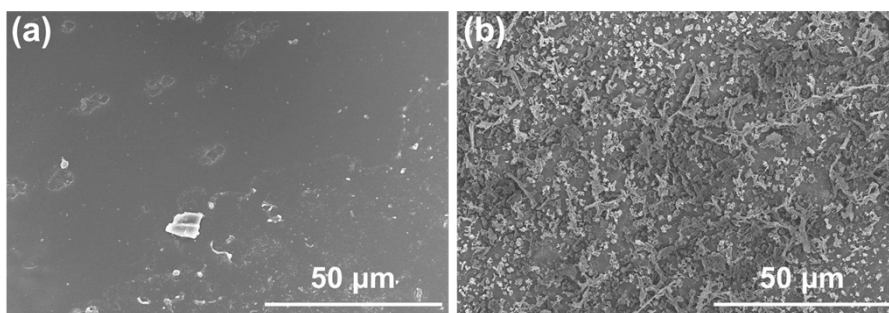

**Fig. S14.** SEM images of the Li anode surface from (a) Li||PIL@Cu and (b) Li||Cu batteries after 20 cycles.

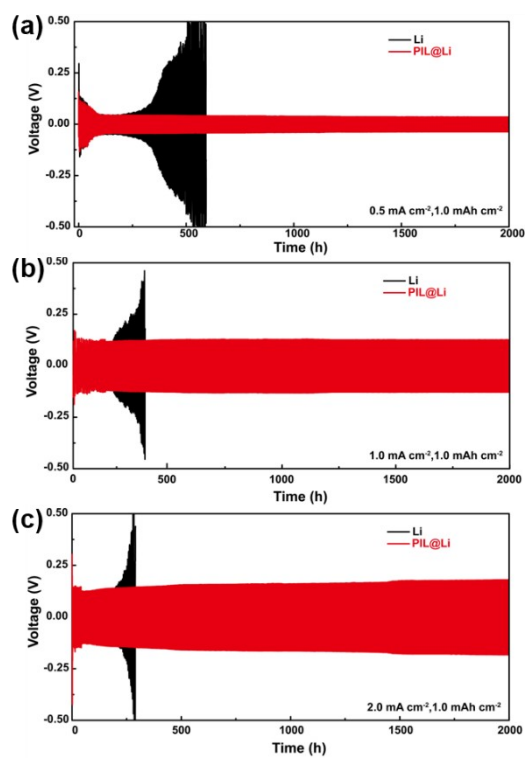

**Fig. S15.** Lithium stripping/plating curves of Li||Li and Li@PIL||PIL@Li symmetric batteries with different current densities. (a) 0.5 mA cm<sup>-2</sup>, (b) 1.0 mA cm<sup>-2</sup> and (c) 2.0 mA cm<sup>-2</sup>.



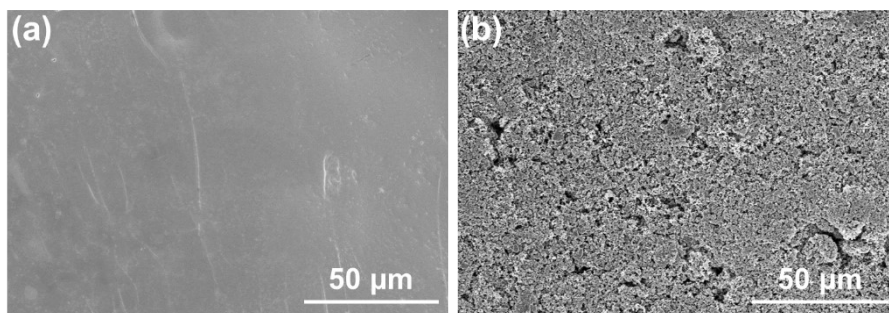

**Fig. S16.** The surface morphology of Li anode from (a)  $\text{Li@PIL}||\text{PIL@Li}$  and (b)  $\text{Li}||\text{Li}$  batteries after 100 cycles.

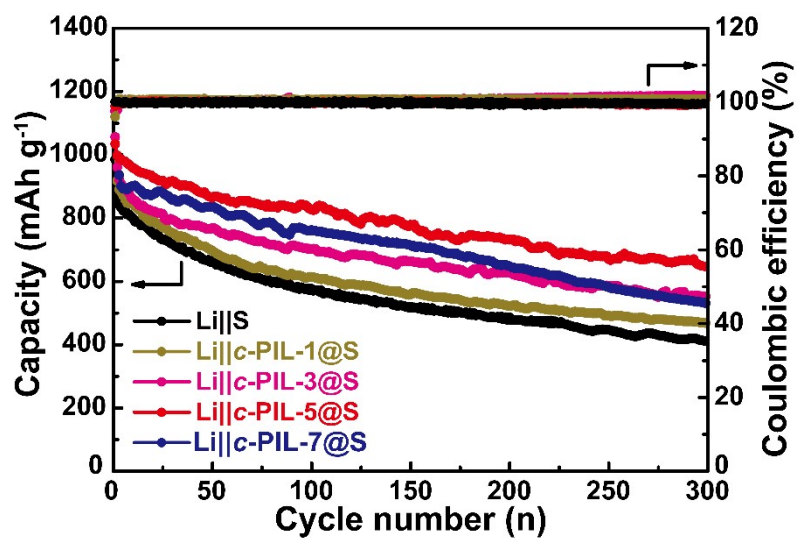

**Fig. S17.** The cycle performance of the Li||*c*-PIL@S batteries with different contents of *c*-PIL.

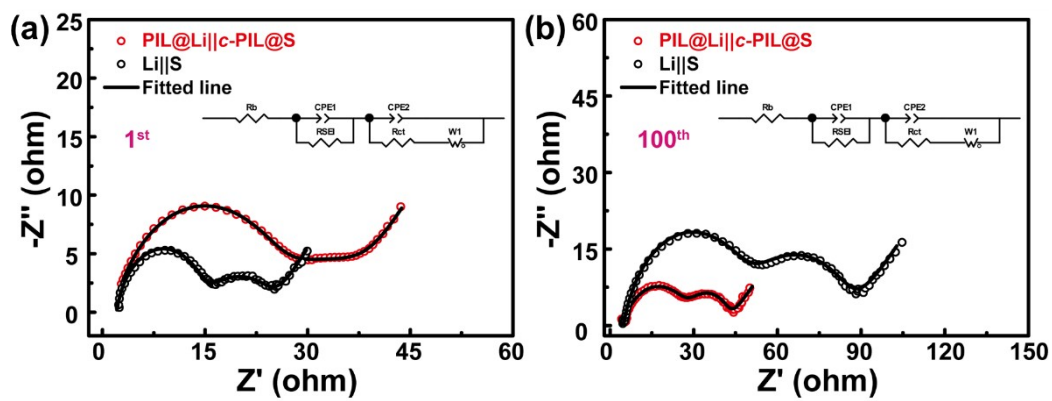

**Fig. S18.** The EIS spectra of (a) Li||S and (b) PIL@Li||c-PIL@S batteries after the 1<sup>st</sup> and 100<sup>th</sup> cycle.

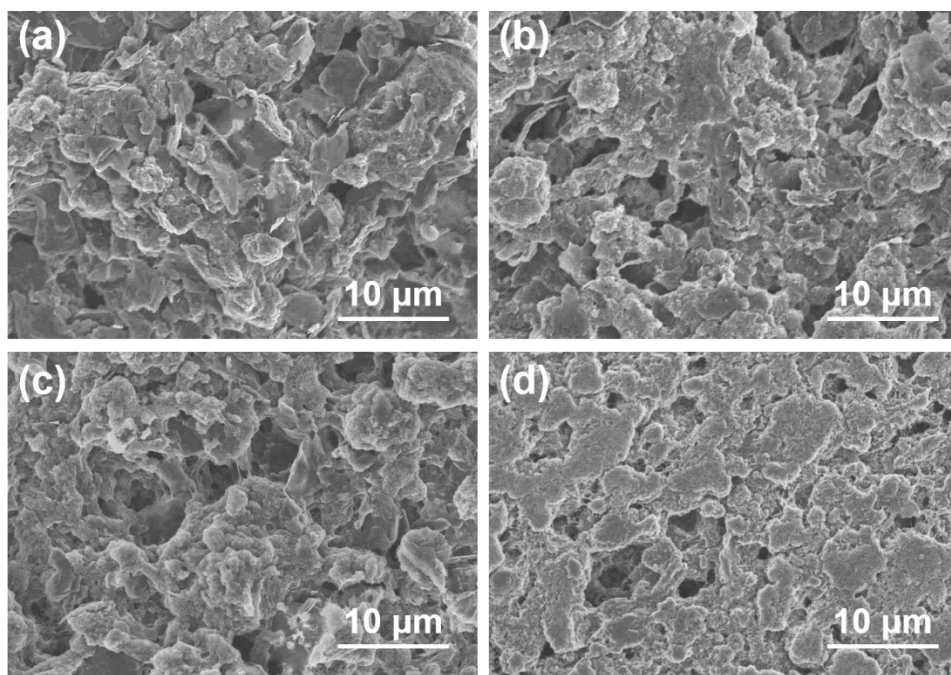

**Fig. S19.** Surface morphologies of the cathode. Cathodes of (a) the initial and (b) the 50<sup>th</sup> cycle from the Li||c-PIL@S battery; (c) the initial and (d) the 50<sup>th</sup> cycle from the Li||S battery.

**Table S1.** Electrochemical performance for the Li-S batteries reported in recent years.

| Electrodes                                | Sulfur loading (mg cm <sup>-2</sup> ) | Sulfur content (%) | E/S ratio (μL mg <sup>-1</sup> ) | Current density (C) | Initial Capacity (mAh g <sup>-1</sup> ) | Capacity decay (%) / Cycles / Decay rate(%) | CE (%)      | Ref.             |
|-------------------------------------------|---------------------------------------|--------------------|----------------------------------|---------------------|-----------------------------------------|---------------------------------------------|-------------|------------------|
| CCSN-S                                    | 1.1-1.3                               | /                  | /                                | 1.0                 | 828.0                                   | 41.4/500/0.083                              | 97.2        | [S1]             |
| DIT/S                                     | 1.5                                   | 49                 | 15                               | 0.2                 | 1092.1                                  | 38.6/400/0.097                              | >97%        | [S2]             |
| PPy-SO <sub>4</sub> /S                    | 2.5                                   | 69.41              | 12                               | 0.2                 | 1149.1                                  | 44.3/300/0.148                              | /           | [S3]             |
| S@c-LSO-TPG                               | 3.3                                   | /                  | 15.2                             | 0.1                 | ~1200                                   | 29.9/100/0.299                              | 97.4        | [S4]             |
| S-co-poly-LCNT                            | 1.0                                   | 58                 | /                                | 0.5                 | 1040                                    | 41.3/200/0.2065                             | ~92         | [S5]             |
| CoNP-VSA@CF                               | 1.22                                  | /                  | 20                               | 0.5                 | 1105                                    | 34.1/500/0.068                              | /           | [S6]             |
| 3D-NOPC@S                                 | 1.0                                   | 70.1               | 32                               | 0.5                 | ~900                                    | 21.9/200/0.109                              | /           | [S7]             |
| S-TVTCSi <sub>4</sub> -CNT <sub>10%</sub> | 1.0                                   | 73.6               | /                                | 0.5                 | 877                                     | 17.6/300/0.059                              | 98.0        | [S8]             |
| S/C <sub>FS</sub>                         | 1.0                                   | 80                 | 40                               | 0.3                 | 1252                                    | 18.0/500/0.036                              | 99.9        | [S9]             |
| 20PVPS                                    | 1.5                                   | 78                 | 15                               | 1.0                 | 859.8                                   | 46.5/500/0.093                              | /           | [S10]            |
| S@pPAN                                    | 1.0                                   | 55                 | /                                | 1.0                 | 795                                     | 10.6/200/0.053                              | ~100        | [S11]            |
| <b>c-PIL@S</b>                            | <b>1.0</b>                            | <b>59</b>          | <b>38</b>                        | <b>0.5</b>          | <b>1035.5</b>                           | <b>31.3/300/0.104</b>                       | <b>98.9</b> | <b>This work</b> |

**Table S2.** Fitted impedance values of Li||S and PIL@Li||c-PIL@S batteries after the 1<sup>st</sup> cycle and 100<sup>th</sup> cycle.

| Battery           | Li  S                         |                              | PIL@Li  c-PIL@S               |                              |
|-------------------|-------------------------------|------------------------------|-------------------------------|------------------------------|
|                   | R <sub>SEI</sub> ( $\Omega$ ) | R <sub>ct</sub> ( $\Omega$ ) | R <sub>SEI</sub> ( $\Omega$ ) | R <sub>ct</sub> ( $\Omega$ ) |
| 1 <sup>st</sup>   | 16.07                         | 9.38                         | 26.60                         | 11.43                        |
| 100 <sup>th</sup> | 51.21                         | 36.77                        | 29.95                         | 17.69                        |

## References

1. J. W. Feng, H. Yi, Z. W. Lei, J. Wang, H. B. Zeng, Y. H. Deng and C. Y. Wang, *J. Energy Chem.*, 2021, **56**, 171-178.
2. G. Yu, G. Ye, C. Wang, C. Wang, Z. Wang, P. Hu, Y. Li, X. X. Feng, S. J. Tan, M. Yan, S. Xin and Z. Liu, *Sci. China Chem.*, 2023, **66**, DOI:10.1007/s11426-023-1808-2.
3. G. W. Yu, C. Y. Wang, W. Dong, Y. W. Tian, Z. Wang, J. Lu, P. Hu, Y. Liu, M. Yan, Y. Li and Z. T. Liu, *J. Colloid Interface Sci.*, 2024, **654**, 201-211.
4. F. H. Wang, J. J. Wan, J. Liu, R. F. Wang and L. Wang, *Chem. Eng. Sci.*, 2023, **282**, 119294.
5. V. K. Tiwari, H. Song, Y. Oh and Y. Jeong, *Energy*, 2020, **195**, 117034.
6. B. Wei, Y. Tu, Y. Xia, W. Theis, J. Zhang, Z. Xu, S. Chen, J. Chen, G. Yin and H. L. Wang, *Chem. Eng. J.*, 2023, **473**, 144887.
7. X. Wang, B. Y. Guo, L. Liu, F. Zhang, C. Xia, L. Cui and F. Yang, *Electrochim. Acta*, 2023, **441**, 141857.
8. S. Wang, Y. Wu, M. Yang, L. Sun, Y. Tao and C. A. Yang, *New J. Chem.*, 2024, **48**, 621-630.
9. H. Li, X. Wu, S. Jiang, Q. Zhang, Y. Cao, H. Yang, F. Cao and X. Ai, *Nano Res.*, 2022, **16**, 8360-8367.
10. B. Long, J. Ma, T. Song, L. Liu, X. Wang, S. Song and Y. Tong, *Chem. Eng. J.*, 2021, **414**, 128799.
11. J. Lei, J. Chen, H. Zhang, A. Naveed, J. Yang, Y. Nuli and J. Wang, *ACS Appl. Mater. Interfaces*, 2020, **12**, 33702-33709.
